# Supplementary material
Source: Springer Nature journal article supplement (https://www.springermedizin.de/resource/supplementary/13020_2013_197_MOESM3_ESM.pdf/9641224)

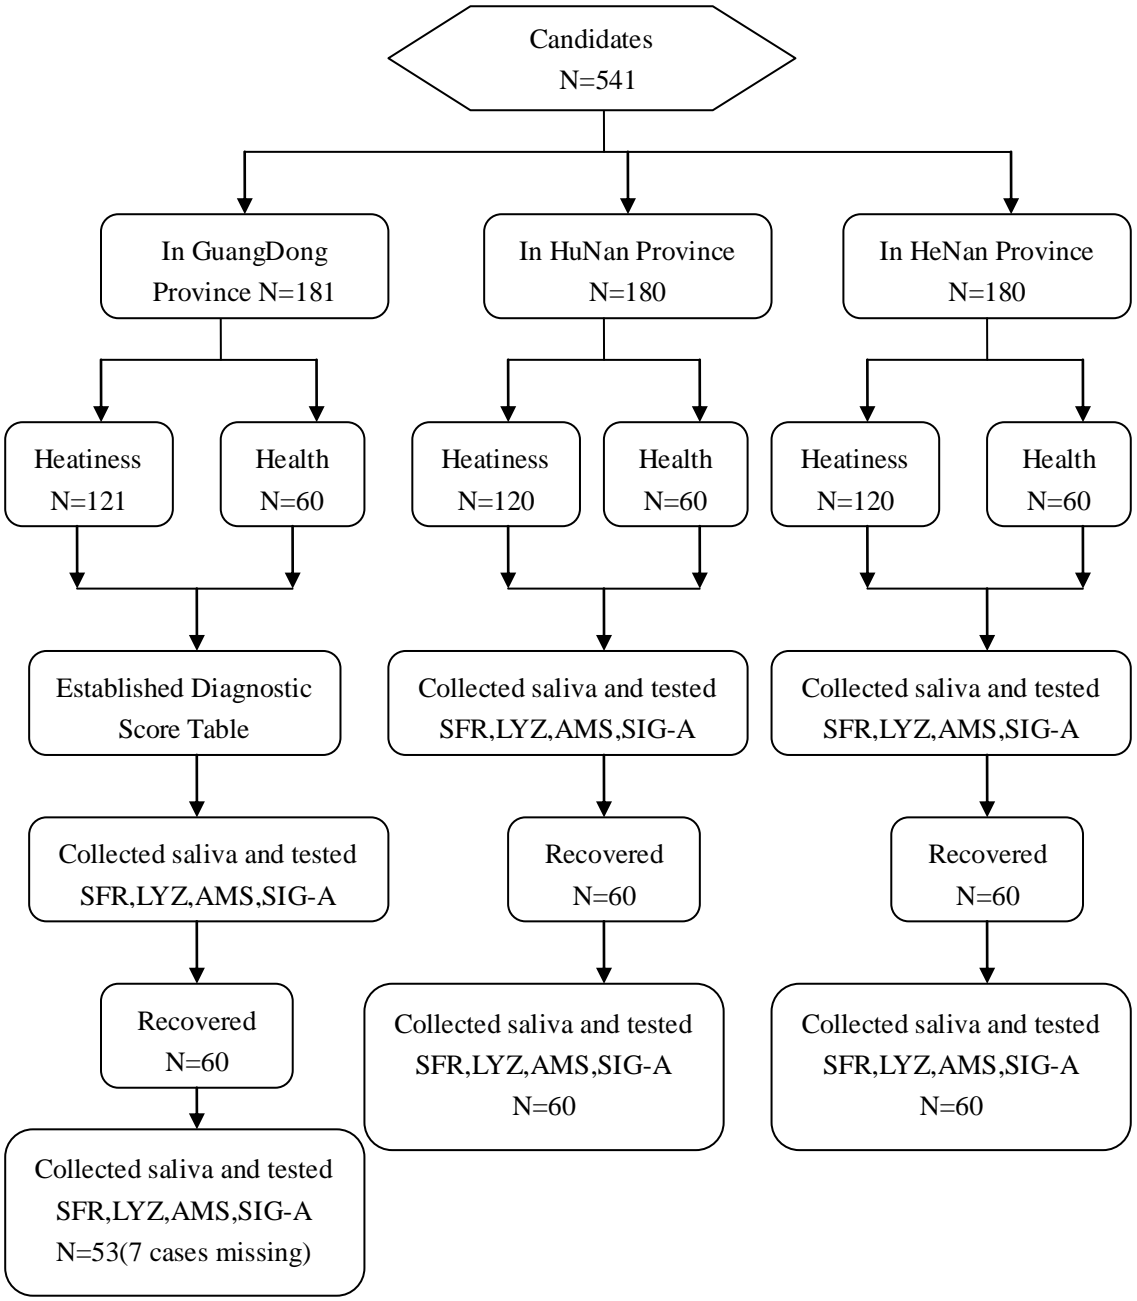

Supplement: MOESM3 [file 9641224]
